# Supplementary material for: The Sle1 Cell Wall Amidase Is Essential for β-Lactam Resistance in Community-Acquired Methicillin-Resistant Staphylococcus aureus USA300
Source: PubMed Central journal article supplement (PMC7187620; doi:10.1128/aac.01931-19), 2019-12-20
Supplement: AAC.01931-19-s0001.pdf [file AAC.01931-19-s0001.pdf]

## Supplemental material

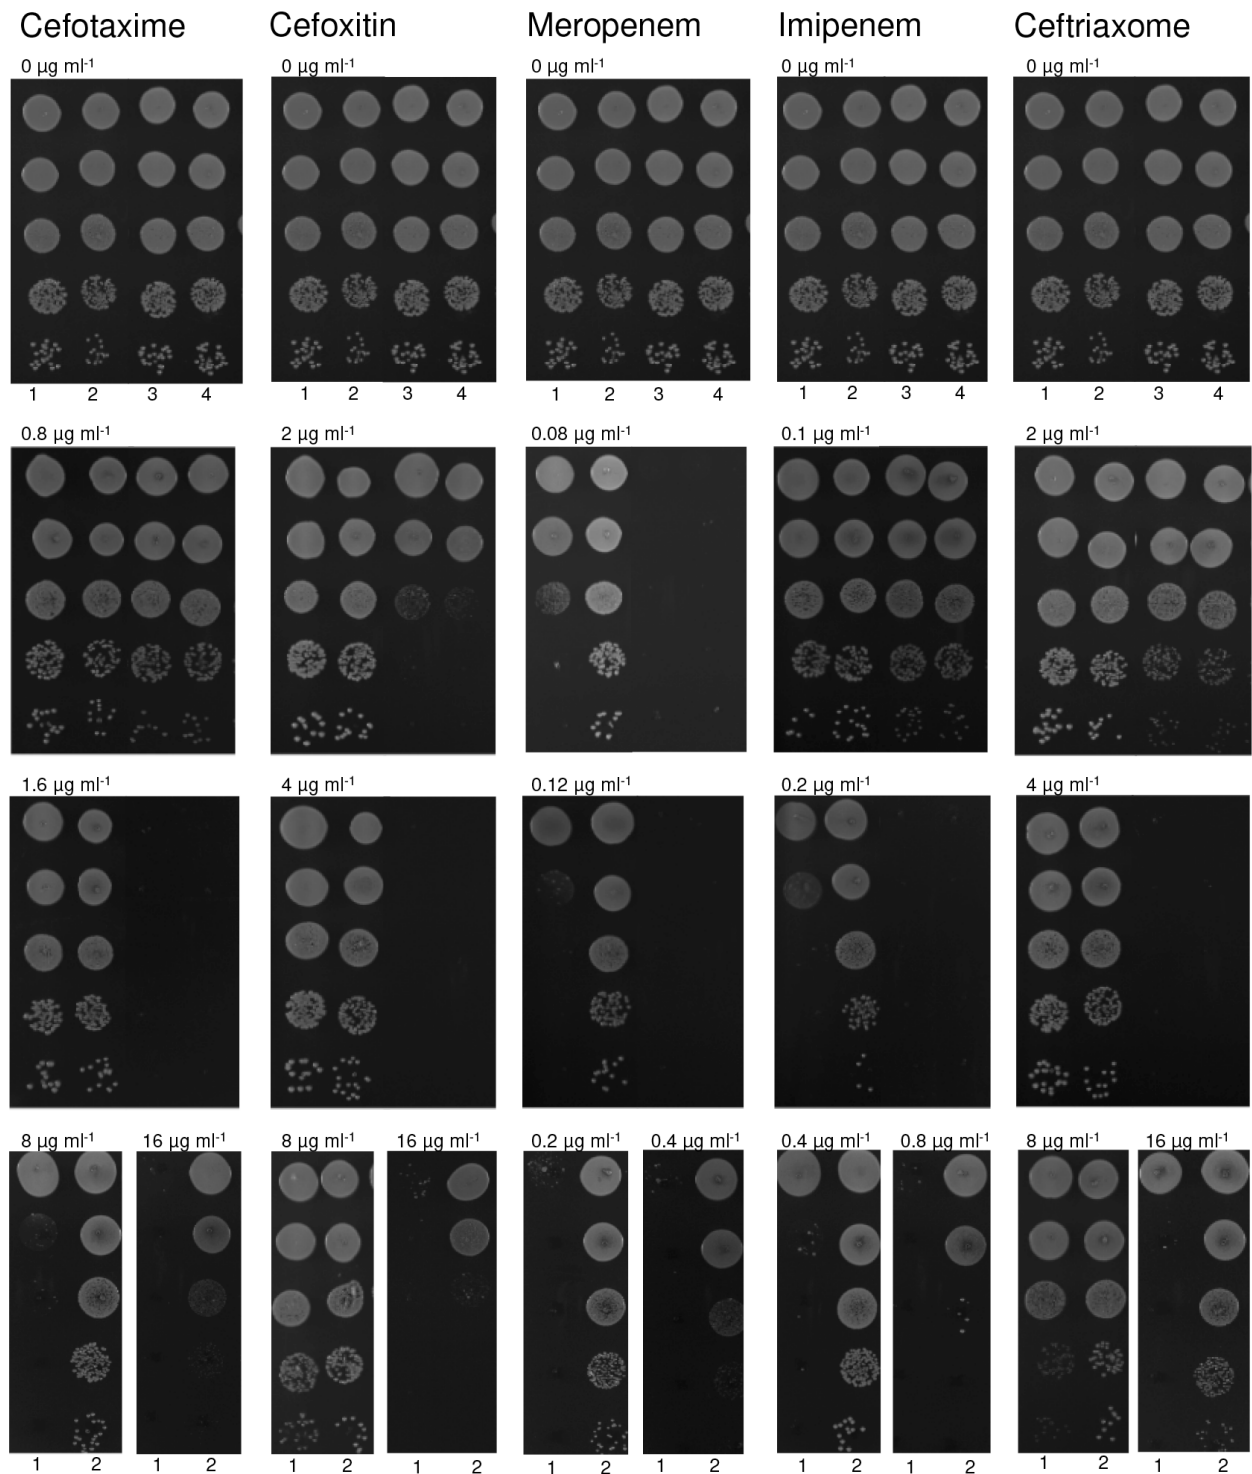

**Fig. S1  $\beta$ -lactam susceptibility in JE2 cells is correlated with *Sle1* levels.** *S. aureus* JE2 wild-type (1), *sle1* (2), *clpX<sub>1265E</sub>* (3) and *clpX<sub>1265E</sub> sle1* (4) cells were grown exponentially in TSB at 37°C. At OD<sub>600</sub> = 0.5, cultures were diluted 10<sup>1</sup>, 10<sup>2</sup>, 10<sup>3</sup> and 10<sup>4</sup>-fold. 10  $\mu$ l of 10<sup>0</sup> and each dilution were spotted on TSA plates with or without  $\beta$ -lactams as indicated.

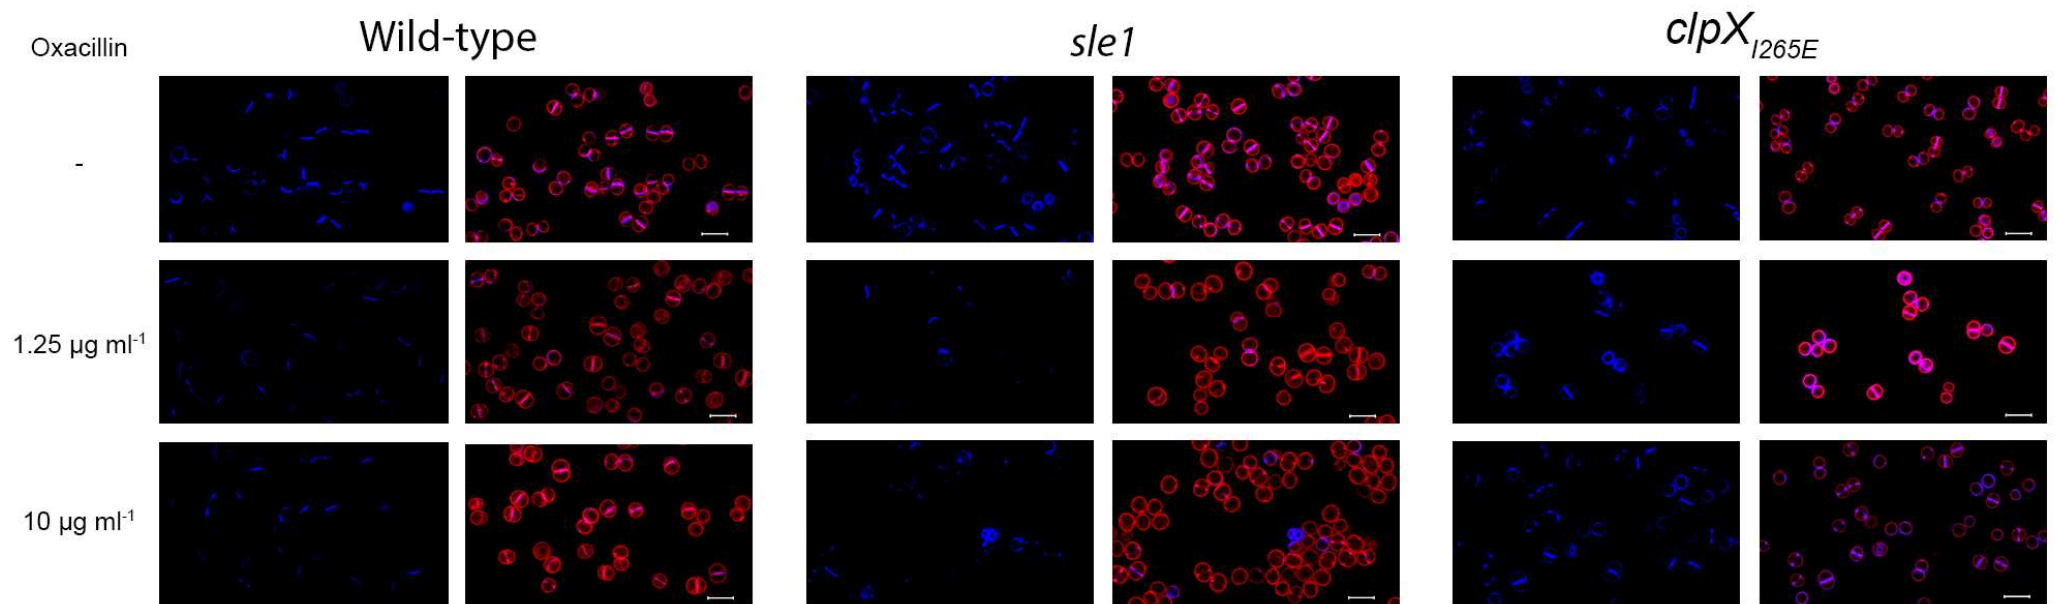

**Fig. S2 Oxacillin interferes with peptidoglycan synthesis in cells devoid of Sle1.** SR-SIM images of JE2 wild-type, *clpX*<sub>I265E</sub>, or *sle1* cells grown to mid-exponential phase at 37°C in the absence or presence of 1.25 μg ml<sup>-1</sup> or 10 μg ml<sup>-1</sup> oxacillin for 20 minutes as indicated.

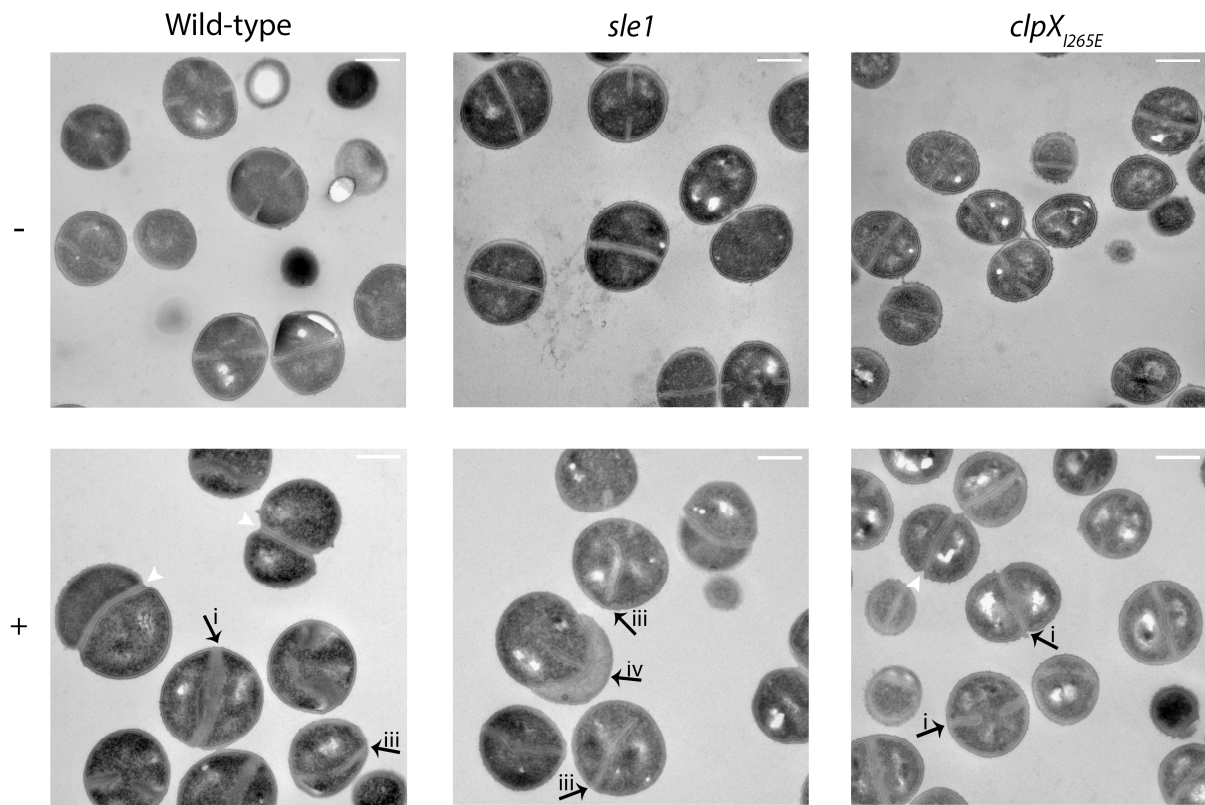

**Fig. S3 TEM images showing morphological changes in cells exposed to oxacillin.** TEM images of JE2 wild-type, *sle1* or *clpX*<sub>1265E</sub> cells grown in TSB to mid-exponential phase at 37°C in the absence (-) or presence of 1.25 µg ml<sup>-1</sup> oxacillin (+) for 20 min. Black arrows point to the characteristic morphological changes described in the legend to Fig. 6: i) thickened septum devoid of the electron-dense mid-zone, iii) septum protruding asymmetrically inwards, and iv) lysed cell. Scale bars, 0.5 µm.

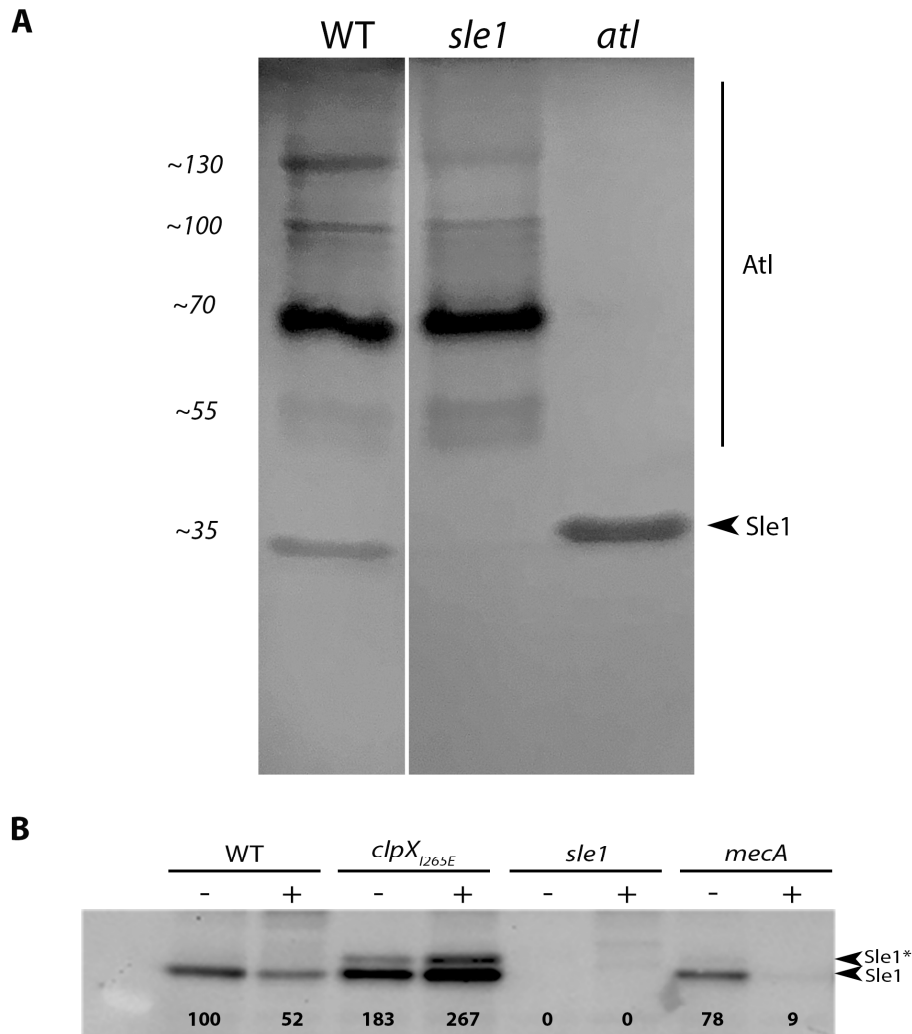

**Fig S4. Sle1 does not accumulate intracellularly in cells exposed to oxacillin.** (A) Zymography demonstrating that the activity of AtI is visible in multiple bands reflecting that the bifunctional AtI murein hydrolase is produced as a precursor protein (Pro-AtI) that is sequentially cleaved to generate several intermediates (B) Sle1 levels in whole cell extracts from the JE2 wild-type wild type and mutant cells grown at 37°C in the absence (-) or presence (+) of 8 µg/ml oxacillin for 1 hour were determined by Western blotting using a Sle1 specific antibody. The Sle1 levels in the different strains were normalized to wild-type levels (100%) using ImageJ. In extracts derived from JE2*clpX*<sub>I265E</sub> cells, the Sle1 antibody specifically recognizes two bands that presumably represent Sle1 with (Sle1\*) and Sle1 without a signal peptide.
